# Supplementary material for: Carbon nanomaterials sensitize prostate cancer cells to docetaxel and mitomycin C via induction of apoptosis and inhibition of proliferation
Source: PubMed Central journal article supplement (PMC5496539; doi:10.3762/bjnano.8.132), 2017-06-23
Supplement: Beilstein_J_Nanotechnol-08-1307-s001.pdf [file Beilstein_J_Nanotechnol-08-1307-s001.pdf]

## **Supporting Information**

for

### **Carbon nanomaterials sensitize prostate cancer cells to docetaxel and mitomycin C via induction of apoptosis and inhibition of proliferation**

Kati Erdmann<sup>\*‡1</sup>, Jessica Ringel<sup>‡1</sup>, Silke Hampel<sup>2</sup>, Manfred P. Wirth<sup>1</sup> and Susanne Fuessel<sup>1</sup>

Address: <sup>1</sup>Department of Urology, Medizinische Fakultät Carl Gustav Carus, Technische Universität Dresden, Fetscherstraße 74, Dresden 01307, Germany and <sup>2</sup>Leibniz Institute of Solid State and Material Research Dresden, P.O. Box 270016, Dresden 01171, Germany

Email: Kati Erdmann\* - kati.erdmann@uniklinikum-dresden.de

\* Corresponding author

‡Equal contributors

**Relative cellular viability of DU-145 cells following monotreatment or combinatory treatment including dose-response curves**

**Table S1:** Relative cellular viability of DU-145 cells following treatment with carbon nanomaterials and chemotherapeutics alone or in combination.<sup>a</sup>

| carbon nanomaterial | chemo-therapeutic | concentration carbon nanomaterial (µg/mL) |                            |                              |                             |                              |                              |                             |                              |
|---------------------|-------------------|-------------------------------------------|----------------------------|------------------------------|-----------------------------|------------------------------|------------------------------|-----------------------------|------------------------------|
|                     |                   | 0                                         | 1                          | 5                            | 10                          | 25                           | 50                           | 100                         | 200                          |
| CNFs                | none              | 100 (CON)                                 | 101.1 ± 2.5                | 97.0 ± 3.0                   | 95.2 ± 4.8                  | 86.9 ± 2.4 <sup>b</sup>      | 78.7 ± 2.4 <sup>b</sup>      | 78.3 ± 3.5 <sup>b</sup>     | 79.4 ± 3.3 <sup>b</sup>      |
|                     | DTX (1.5 ng/mL)   | 94.1 ± 3.5                                | 89.0 ± 3.8 <sup>b,c</sup>  | n.d.                         | 77.6 ± 8.4 <sup>b,c,d</sup> | 49.8 ± 4.5 <sup>b,c,d</sup>  | 37.4 ± 5.1 <sup>b,c,d</sup>  | 27.0 ± 4.3 <sup>b,c,d</sup> | 27.9 ± 5.0 <sup>b,c,d</sup>  |
|                     | MMC (0.3 µg/mL)   | 67.9 ± 9.2 <sup>b</sup>                   | 61.5 ± 12.3 <sup>b,c</sup> | 46.0 ± 11.8 <sup>b,c,d</sup> | 33.8 ± 8.8 <sup>b,c,d</sup> | 25.2 ± 10.1 <sup>b,c,d</sup> | 19.6 ± 10.2 <sup>b,c,d</sup> | n.d.                        | 19.1 ± 11.0 <sup>b,c,d</sup> |
| CNTs                | none              | 100 (CON)                                 | 95.7 ± 3.3                 | 95.4 ± 3.0                   | 95.1 ± 0.4                  | 93.7 ± 5.3                   | 90.1 ± 3.9 <sup>b</sup>      | 88.2 ± 4.3 <sup>b</sup>     | 79.6 ± 4.1 <sup>b</sup>      |
|                     | DTX (1.5 ng/mL)   | 94.1 ± 3.5                                | 93.6 ± 1.0                 | n.d.                         | 91.4 ± 0.4                  | 89.3 ± 3.8                   | 85.2 ± 2.8 <sup>b</sup>      | 80.3 ± 4.0 <sup>b,d</sup>   | 70.4 ± 5.3 <sup>b,d</sup>    |
|                     | MMC (0.3 µg/mL)   | 67.9 ± 9.2 <sup>b</sup>                   | 69.9 ± 5.9 <sup>b,c</sup>  | 67.9 ± 6.8 <sup>b,c</sup>    | 64.6 ± 5.7 <sup>b,c</sup>   | 61.2 ± 4.7 <sup>b,c</sup>    | 54.5 ± 7.2 <sup>b,c</sup>    | n.d.                        | 47.3 ± 3.6 <sup>b,c,d</sup>  |

<sup>a</sup>Combinatory treatments contained the respective carbon nanomaterial and chemotherapeutic in the same concentrations as indicated for the individual treatments. Results are depicted as averaged relative cellular viability (%) ± relative mean deviation. Untreated cells (CON) served as control (100%). The effects of CNFs and CNTs on cellular viability have been reported previously [28]; n.d.: not determined.

<sup>b</sup> $p < 0.05$  treatment versus control, <sup>c</sup> $p < 0.05$  treatment versus carbon nanomaterial alone, <sup>d</sup> $p < 0.05$  treatment versus chemotherapeutic alone

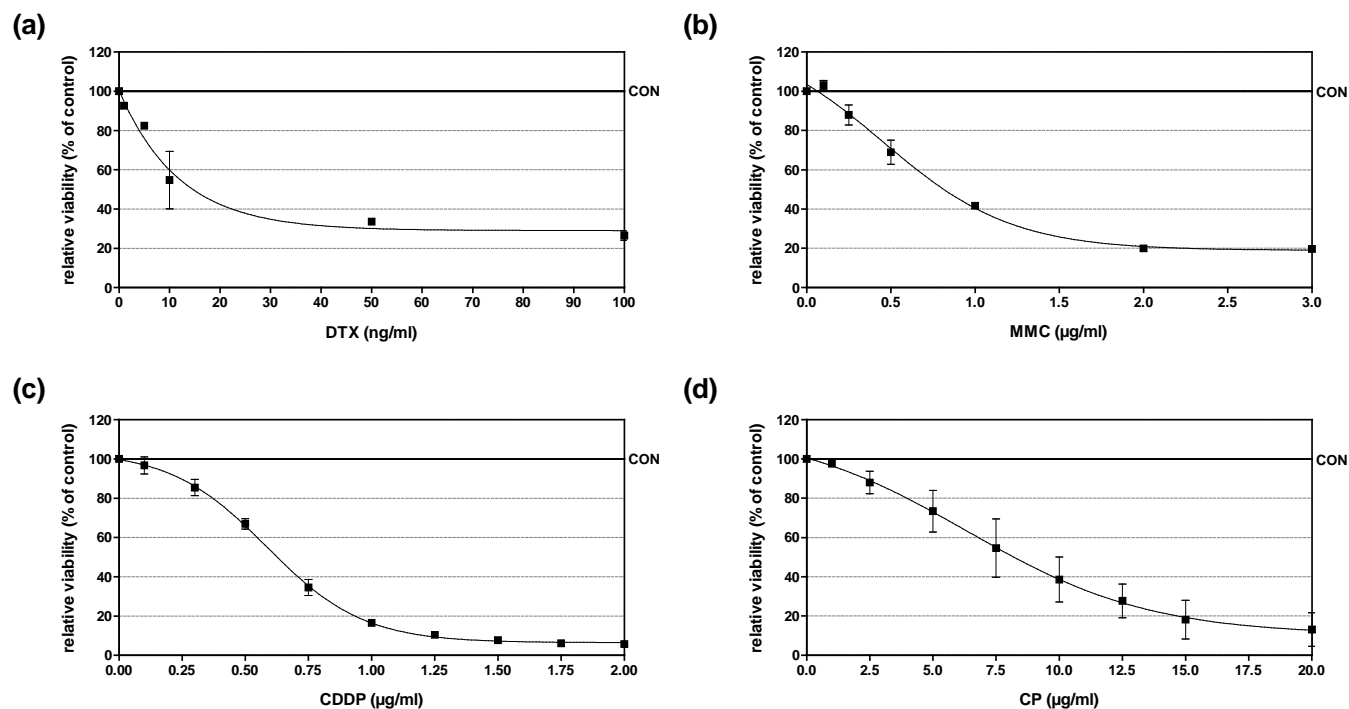

**Figure S1:** Relative cellular viability of DU-145 cells treated with increasing concentrations of (a) DTX, (b) MMC, (c) CDDP and (d) CP. Results are depicted as averaged relative cellular viability (%)  $\pm$  relative mean deviation. The effects of CDDP and CP on cellular viability have been reported previously [28]. Cells were treated for 2 h (DTX, MMC) or 24 h (CDDP, CP) with increasing concentrations of the chemotherapeutics. Assessment of cellular viability was conducted 72 h after end of treatment. Untreated cells (CON) served as control (100%). The 50% inhibitory concentrations (IC<sub>50</sub>) calculated from the dose-response curves were 8.96 ng/mL for DTX, 0.63  $\mu\text{g/mL}$  for MMC, 0.62  $\mu\text{g/mL}$  for CDDP and 8.35  $\mu\text{g/mL}$  for CP.
